# Supplementary material for: Comments by Microbiologists for Interpreting Antimicrobial Susceptibility Testing and Improving the Appropriateness of Antibiotic Therapy in Community-Acquired Urinary Tract Infections: A Randomized Double-Blind Digital Case-Vignette Controlled Superiority Trial
Source: MDPI journal article supplement (doi:10.3390/antibiotics12081272), 2023-08-02
Supplement: s1 [file s1]

**Supplementary Table S1.** Comments displayed to General Practitioners randomized in the intervention arm, by case-vignette.

| Case vignette                                      | Number 1                                                                    | Number 2                                                      | Number 3                                                                                                                                                      | Number 4                                                                                       | Number 5                                                                                                                                                           | Number 6                                                                                                                |
|----------------------------------------------------|-----------------------------------------------------------------------------|---------------------------------------------------------------|---------------------------------------------------------------------------------------------------------------------------------------------------------------|------------------------------------------------------------------------------------------------|--------------------------------------------------------------------------------------------------------------------------------------------------------------------|-------------------------------------------------------------------------------------------------------------------------|
| <b>Clinical situation</b>                          | Complicated cystitis                                                        | Male UTI                                                      | Uncomplicated pyelonephritis                                                                                                                                  | Pyelonephritis at risk of complication                                                         | Bacteriuria in pregnancy                                                                                                                                           | Indwelling urinary catheter-associated bacteriuria                                                                      |
| <b>Sex</b>                                         | Female                                                                      | Male                                                          | Female                                                                                                                                                        | Female                                                                                         | Female                                                                                                                                                             | Female                                                                                                                  |
| <b>Age</b>                                         | 76 years of age                                                             | 60 years of age                                               | 33 years of age                                                                                                                                               | 77 years of age                                                                                | 29 years of age                                                                                                                                                    | 43 years of age                                                                                                         |
| <b>Prior exposure to antibiotics</b>               | No                                                                          | No                                                            | No                                                                                                                                                            | Levofloxacin 4 months ago                                                                      | No                                                                                                                                                                 | No                                                                                                                      |
| <b>Pathogen</b>                                    | <i>P. mirabilis</i> >10 <sup>5</sup>                                        | <i>E. coli</i> >10 <sup>6</sup>                               | <i>E. coli</i> >10 <sup>5</sup>                                                                                                                               | <i>E. coli</i> >10 <sup>6</sup>                                                                | <i>E. coli</i> >10 <sup>6</sup>                                                                                                                                    | <i>E. cloacae</i> >10 <sup>5</sup>                                                                                      |
| <b>Antibiotic susceptibility</b>                   |                                                                             |                                                               |                                                                                                                                                               |                                                                                                |                                                                                                                                                                    |                                                                                                                         |
| <b><i>Penicillins, Carbapenems, Monobactam</i></b> |                                                                             |                                                               |                                                                                                                                                               |                                                                                                |                                                                                                                                                                    |                                                                                                                         |
| Pivmecillinam                                      | Sensitive                                                                   | Resistant                                                     | Sensitive                                                                                                                                                     | Sensitive                                                                                      | Sensitive                                                                                                                                                          | Not tested                                                                                                              |
| Ampicillin                                         | Resistant                                                                   | Resistant                                                     | Resistant                                                                                                                                                     | Resistant                                                                                      | Sensitive                                                                                                                                                          | Not tested                                                                                                              |
| Amoxicillin-Clavulanate (cystitis)                 | Sensitive                                                                   | Resistant                                                     | Sensitive                                                                                                                                                     | Resistant                                                                                      | Sensitive                                                                                                                                                          | Resistant                                                                                                               |
| Amoxicillin-Clavulanate (other)                    | Sensitive                                                                   | Resistant                                                     | Sensitive                                                                                                                                                     | Resistant                                                                                      | Sensitive                                                                                                                                                          | Resistant                                                                                                               |
| Piperacillin-Tazobactam                            | Sensitive                                                                   | Sensitive                                                     | Sensitive                                                                                                                                                     | Sensitive                                                                                      | Sensitive                                                                                                                                                          | Resistant                                                                                                               |
| Temocillin                                         | Sensitive                                                                   | Resistant                                                     | Sensitive                                                                                                                                                     | Sensitive                                                                                      | Sensitive                                                                                                                                                          | Resistant                                                                                                               |
| Ticarcillin                                        | Resistant                                                                   | Resistant                                                     | Resistant                                                                                                                                                     | Resistant                                                                                      | Resistant                                                                                                                                                          | Resistant                                                                                                               |
| Ertapenem                                          | Sensitive                                                                   | Sensitive                                                     | Sensitive                                                                                                                                                     | Sensitive                                                                                      | Sensitive                                                                                                                                                          | Sensitive                                                                                                               |
| <b><i>Cephalosporins</i></b>                       |                                                                             |                                                               |                                                                                                                                                               |                                                                                                |                                                                                                                                                                    |                                                                                                                         |
| Cefoxitin                                          | Sensitive                                                                   | Sensitive                                                     | Sensitive                                                                                                                                                     | Resistant                                                                                      | Sensitive                                                                                                                                                          | Resistant                                                                                                               |
| Cefixime                                           | Sensitive                                                                   | Sensitive                                                     | Resistant                                                                                                                                                     | Resistant                                                                                      | Sensitive                                                                                                                                                          | Resistant                                                                                                               |
| Ceftazidime                                        | Sensitive                                                                   | Sensitive                                                     | Intermediate                                                                                                                                                  | Intermediate                                                                                   | Sensitive                                                                                                                                                          | Resistant                                                                                                               |
| Ceftriaxone                                        | Sensitive                                                                   | Sensitive                                                     | Resistant                                                                                                                                                     | Resistant                                                                                      | Sensitive                                                                                                                                                          | Resistant                                                                                                               |
| <b><i>Aminoglycosides</i></b>                      |                                                                             |                                                               |                                                                                                                                                               |                                                                                                |                                                                                                                                                                    |                                                                                                                         |
| Gentamicin                                         | Sensitive                                                                   | Sensitive                                                     | Sensitive                                                                                                                                                     | Sensitive                                                                                      | Sensitive                                                                                                                                                          | Sensitive                                                                                                               |
| Amikacin                                           | Sensitive                                                                   | Sensitive                                                     | Sensitive                                                                                                                                                     | Sensitive                                                                                      | Sensitive                                                                                                                                                          | Sensitive                                                                                                               |
| <b><i>Quinolones, Fluoroquinolones</i></b>         |                                                                             |                                                               |                                                                                                                                                               |                                                                                                |                                                                                                                                                                    |                                                                                                                         |
| Nalidixic acid                                     | Intermediate                                                                | Sensitive                                                     | Sensitive                                                                                                                                                     | Sensitive                                                                                      | Sensitive                                                                                                                                                          | Sensitive                                                                                                               |
| Ofloxacin                                          | Sensitive                                                                   | Sensitive                                                     | Sensitive                                                                                                                                                     | Sensitive                                                                                      | Sensitive                                                                                                                                                          | Sensitive                                                                                                               |
| Levofloxacin                                       | Sensitive                                                                   | Sensitive                                                     | Sensitive                                                                                                                                                     | Sensitive                                                                                      | Sensitive                                                                                                                                                          | Sensitive                                                                                                               |
| <b><i>Others</i></b>                               |                                                                             |                                                               |                                                                                                                                                               |                                                                                                |                                                                                                                                                                    |                                                                                                                         |
| Sulfamethoxazole/trimethoprim                      | Resistant                                                                   | Resistant                                                     | Sensitive                                                                                                                                                     | Sensitive                                                                                      | Sensitive                                                                                                                                                          | Sensitive                                                                                                               |
| Nitrofurantoin (cystitis)                          | Sensitive                                                                   | Sensitive                                                     | Sensitive                                                                                                                                                     | Sensitive                                                                                      | Sensitive                                                                                                                                                          | Sensitive                                                                                                               |
| Fosfomycin (cystitis)                              | Sensitive                                                                   | Sensitive                                                     | Sensitive                                                                                                                                                     | Sensitive                                                                                      | Sensitive                                                                                                                                                          | Sensitive                                                                                                               |
| <b>Comment provided</b>                            | « The first-line recommended treatment is pivmecillinam or nitrofurantoin » | « The first-line recommended treatment is a fluoroquinolone » | « The first-line recommended treatment is amoxicillin-clavulanate; the 2 <sup>nd</sup> line treatment is a fluoroquinolone or trimethoprim-sulfamethoxazole » | « The first-line recommended treatment is a fluoroquinolone or trimethoprim-sulfamethoxazole » | « Colonization to be treated. The first-line recommended treatment is amoxicillin; the 2 <sup>nd</sup> line treatment is pivmecillinam or fosfomycin tromethamol » | « According to guidelines, a urinalysis is not indicated except in case of pregnancy or for planned urological surgery» |
